# Supplementary material for: CT Features of Small Bowel Obstruction Caused by Concurrent, Ipsilateral Obturator and Inguinal Herniæ
Source: Preprints.org preprint supplement (doi:10.20944/preprints202201.0319.v1), 2022-01-21
Supplement: Supplementary file 1 [file supplementary]

## **ETHICAL STATEMENT**

The production and publication of the Case Report “CT features of small bowel obstruction caused by concurrent, ipsilateral obturator and inguinal herniæ” has been authorised in urgency by the Ethical Committee of the Ospedale Sacro Cuore di Gesù FBF in Benevento, Italy on 19 January 2022, protocol no. CEFBF - 2/22

Formal authorisation for anonymous publication of the defunct patient’s medical data, including DICOM images, has been requested to her sons.

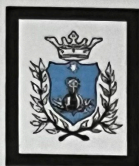

PROVINCIA RELIGIOSA DI SAN PIETRO  
DELL'ORDINE OSPEDALIERO DI SAN GIOVANNI DI DIO  
FATEBENEFRATELLI

## OSPEDALE «SACRO CUORE DI GESÙ»

Viale Principe di Napoli, 14/A – 82100 BENEVENTO – Tel: 0824-771-111

COMITATO ETICO

### Dirigenti Medici

Dr. Carmine Manganiello  
(Direttore)  
Dr. Silvio De Lucia  
Dr. Andrea Festa  
Dr. Giovanni Fontanella  
Dr.ssa Elvira Guerriero

### T.S.R.M.

Felice De Rosa  
(coordinatore)  
Sandro Calderazzo  
Simone Coviello  
Anna Vincenza De Lucia  
Diego De Stasio  
Luigi Di Cerbo  
Giuliano Fabrizio  
Giovanni Fuggi  
Ferdinando Giorgione  
Cosimo Saverio Mazzeo  
Gianfranco Luigi Micco  
Carlo Nazzaro  
Maurizio Orso  
Marco Russo

### Accettazione Radiologica

Antonietta Iarriccio

### Infermieri Professionali

Antonietta Cardone  
Adriana Insogna

### CONSENSO INFORMATO PER PUBBLICAZIONE IN ARTICOLI SCIENTIFICI, LIBRI E RIVISTE D'INTERESSE MEDICO

Si attesta che il/la sig. ....  
nato/a a .....  
e residente a .....  
Via/ Piazza ..... N° .....  
In data odierna è stato sottoposto/o ad esame diagnostico  
strumentale presso codesto centro dalle ore ..... alle ore  
..... ed acconsente all'utilizzo delle immagini diagnostiche  
per finalità di pubblicazione scientifica in anonimo.

Benevento, .....

In fede
